# Supplementary material for: LCS-TA to identify similar fragments in RNA 3D structures
Source: PubMed Central journal article supplement (PMC5651598; doi:10.1186/s12859-017-1867-6), 2017-10-23

## **Additional file 1 (supplementary data)**

# **LCS-TA to identify similar fragments in RNA 3D structures**

Jakub Wiedemann<sup>1</sup>, Tomasz Zok<sup>1,2</sup>, Maciej Milostan<sup>1,2</sup>, Marta Szachniuk<sup>1,3\*</sup>

<sup>1</sup>Institute of Computing Science & European Centre for Bioinformatics and Genomics, Poznan University of Technology, Piotrowo 2, 60-965 Poznan, Poland.

<sup>2</sup>Poznan Supercomputing and Networking Center, Jana Pawla II 10, 61-139 Poznan, Poland.

<sup>3</sup>Institute of Bioorganic Chemistry, Polish Academy of Sciences, Noskowskiego 12/14, 61-704 Poznan, Poland.

\*corresponding author: [marta.szachniuk@cs.put.poznan.pl](mailto:marta.szachniuk@cs.put.poznan.pl)

**Table S1:** LCS-TA results for predicted models of 4R4V structure in the sequence-independent mode.

| MCQ threshold \ Model | 5°       |       | 10°       |       | 15        |        | 20°        |        | 25°        |        | ≥30°       |        |
|-----------------------|----------|-------|-----------|-------|-----------|--------|------------|--------|------------|--------|------------|--------|
|                       | LCS      | MCQ   | LCS       | MCQ   | LCS       | MCQ    | LCS        | MCQ    | LCS        | MCQ    | LCS        | MCQ    |
| Adamiak_1             | 4        | 4.61° | 10        | 8.58° | 25        | 14.79° | 25         | 19.52° | 138        | 24.89° | 185        | 26.80° |
| Bujnicki_1            | 4        | 4.43° | 13        | 9.21° | <b>39</b> | 14.52° | <b>176</b> | 19.96° | <b>185</b> | 20.33° | <b>185</b> | 20.33° |
| Chen_1                | 0        | n/a   | 6         | 8.64° | 14        | 14.59° | 24         | 19.69° | 41         | 24.77° | 75         | 29.95° |
| Das_1                 | <b>5</b> | 4.45° | <b>14</b> | 9.79° | 25        | 14.01° | 64         | 19.88° | 185        | 23.09° | 185        | 23.09° |
| Ding_1                | 0        | n/a   | 12        | 9.49° | 34        | 14.83° | 91         | 18.98° | 185        | 22.00° | 185        | 22.00° |
| Dokholyan_1           | 0        | n/a   | 10        | 9.63° | 26        | 14.90° | 55         | 19.90° | 181        | 24.91° | 185        | 25.43° |
| Major_1               | 0        | n/a   | 6         | 9.41° | 15        | 14.42° | 23         | 19.80° | 42         | 24.98° | 63         | 29.84° |

**Table S2:** LCS-TA results for predicted models of 4R4V structure in the sequence-dependent mode.

| MCQ threshold \ Model | 5°  |     | 10°       |       | 15°       |        | 20°       |        | 25°        |        | ≥30°       |        |
|-----------------------|-----|-----|-----------|-------|-----------|--------|-----------|--------|------------|--------|------------|--------|
|                       | LCS | MCQ | LCS       | MCQ   | LCS       | MCQ    | LCS       | MCQ    | LCS        | MCQ    | LCS        | MCQ    |
| Adamiak_1             | 0   | n/a | 7         | 9.72° | 13        | 14.38° | 30        | 19.96° | 63         | 24.88° | 185        | 26.80° |
| Bujnicki_1            | 0   | n/a | 11        | 9.59° | 28        | 14.62° | <b>97</b> | 20.00° | <b>185</b> | 20.33° | <b>185</b> | 20.33° |
| Chen_1                | 0   | n/a | 5         | 9.88° | 11        | 14.97° | 18        | 19.99° | 29         | 24.99° | 62         | 33.33° |
| Das_1                 | 0   | n/a | 7         | 9.83° | 14        | 14.85° | 33        | 19.96° | 185        | 23.09° | 185        | 23.09° |
| Ding_1                | 0   | n/a | <b>12</b> | 9.49° | <b>34</b> | 14.83° | 65        | 19.99° | 185        | 22.00° | 185        | 22.00° |
| Dokholyan_1           | 0   | n/a | 4         | 9.44° | 14        | 14.41° | 23        | 19.58° | 118        | 24.96° | 185        | 25.43° |
| Major_1               | 0   | n/a | 0         | n/a   | 11        | 14.90° | 16        | 18.45° | 28         | 24.53° | 63         | 29.89° |

**Table S3:** LCS-TA results for predicted models of 4L81 structure in the sequence-independent mode.

| MCQ threshold \ Model | 5°       |       | 10°       |       | 15°       |        | 20°       |        | ≥25°      |        |
|-----------------------|----------|-------|-----------|-------|-----------|--------|-----------|--------|-----------|--------|
|                       | LCS      | MCQ   | LCS       | MCQ   | LCS       | MCQ    | LCS       | MCQ    | LCS       | MCQ    |
| Adamiak_1             | 0        | n/a   | 13        | 9.47° | 35        | 14.88° | 86        | 19.91° | 96        | 20.89° |
| Bujnicki_1            | <b>8</b> | 4.97° | <b>22</b> | 9.41° | 43        | 14.16° | 96        | 17.04° | 96        | 17.04° |
| Chen_1                | 0        | n/a   | 8         | 9.65° | 21        | 14.82° | 45        | 19.89° | 96        | 23.07° |
| Das_1                 | 6        | 4.98° | 18        | 9.87° | <b>87</b> | 14.88° | <b>96</b> | 15.79° | <b>96</b> | 15.79° |
| Ding_1                | 0        | n/a   | 13        | 9.85° | 35        | 14.93° | 95        | 19.53° | 96        | 20.87° |
| Dokholyan_1           | 0        | n/a   | 9         | 9.33° | 18        | 14.17° | 59        | 19.94° | 96        | 22.42° |

**Table S4:** LCS-TA results for predicted models of 4L81 structure in the sequence-dependent mode.

| MCQ threshold \ Model | 5°       |       | 10°       |       | 15°       |        | 20°       |        | ≥25°      |        |
|-----------------------|----------|-------|-----------|-------|-----------|--------|-----------|--------|-----------|--------|
|                       | LCS      | MCQ   | LCS       | MCQ   | LCS       | MCQ    | LCS       | MCQ    | LCS       | MCQ    |
| Adamiak_1             | 0        | n/a   | 8         | 9.49° | 27        | 14.84° | 85        | 19.75° | 96        | 20.89° |
| Bujnicki_1            | <b>8</b> | 4.97° | <b>22</b> | 9.41° | 43        | 14.16° | 96        | 17.04° | 96        | 17.04° |
| Chen_1                | 0        | n/a   | 0         | n/a   | 14        | 14.70° | 45        | 19.89° | 96        | 23.07° |
| Das_1                 | 0        | n/a   | 18        | 9.87° | <b>87</b> | 14.88° | <b>96</b> | 15.79° | <b>96</b> | 15.79° |
| Ding_1                | 0        | n/a   | 6         | 9.96° | 23        | 14.76° | 81        | 19.83° | 96        | 20.87° |
| Dokholyan_1           | 0        | n/a   | 5         | 9.32° | 8         | 14.93° | 31        | 19.73° | 96        | 22.42° |

**Figure S1:** LCS-TA results for predicted models of 4R4V in (a) sequence-independent and (b) sequence-dependent mode.

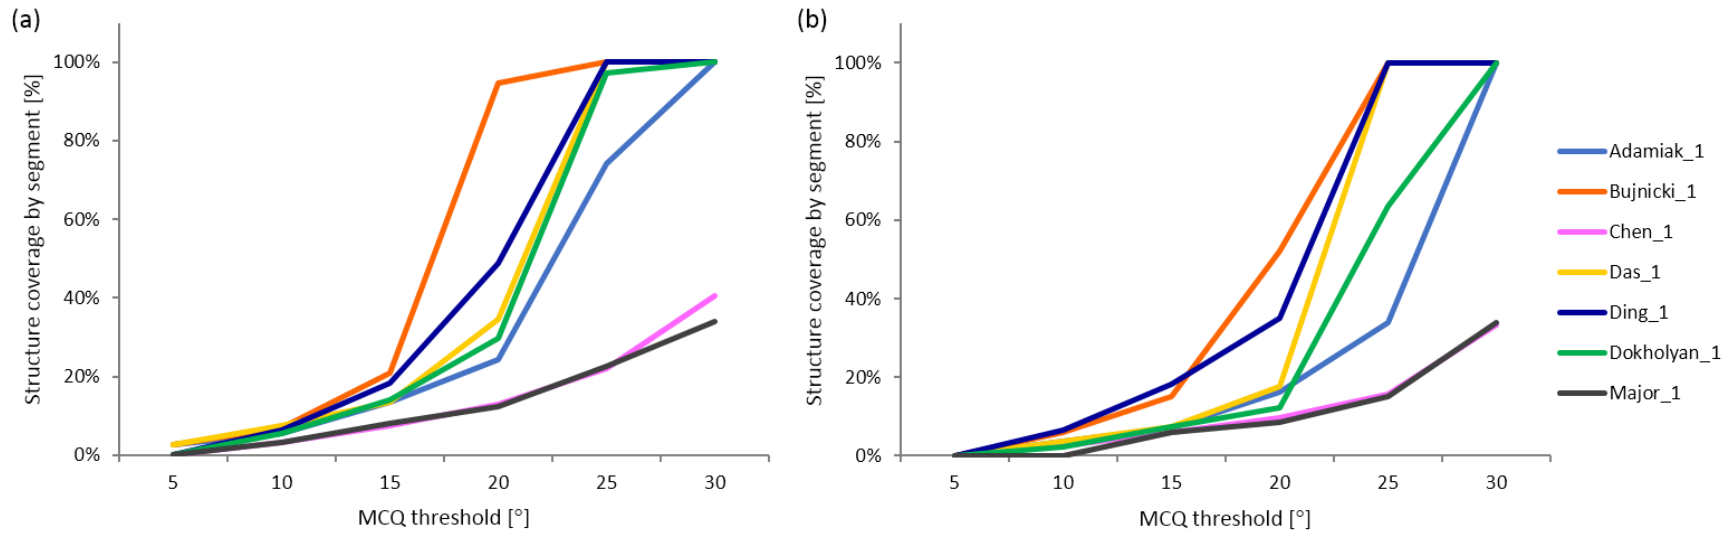

**Figure S2:** LCS-TA results for predicted models of 4L81 in (a) sequence-independent and (b) sequence-dependent mode.

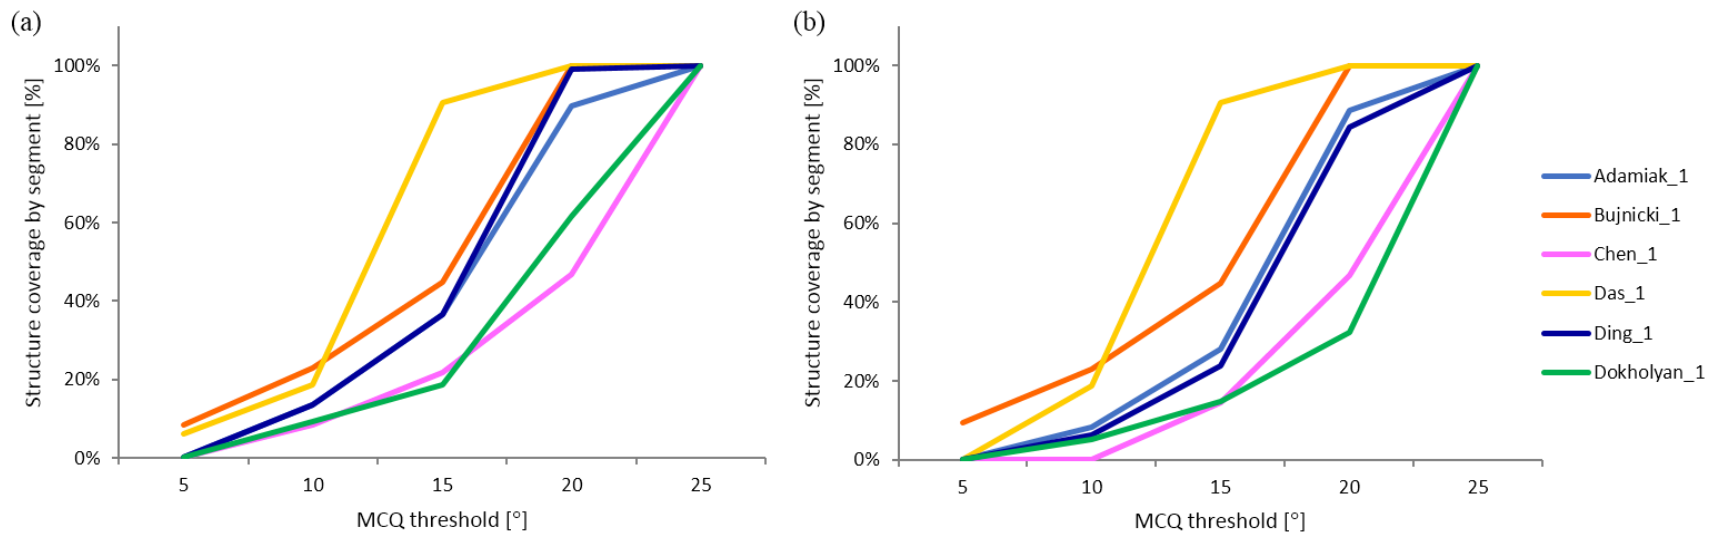



**Figure S3:** Results of (a) Bujnicki\_1, (b) Das\_1, and (c) Dokholyan\_1 model comparison to the target structure (4L81) by RNAAssess.

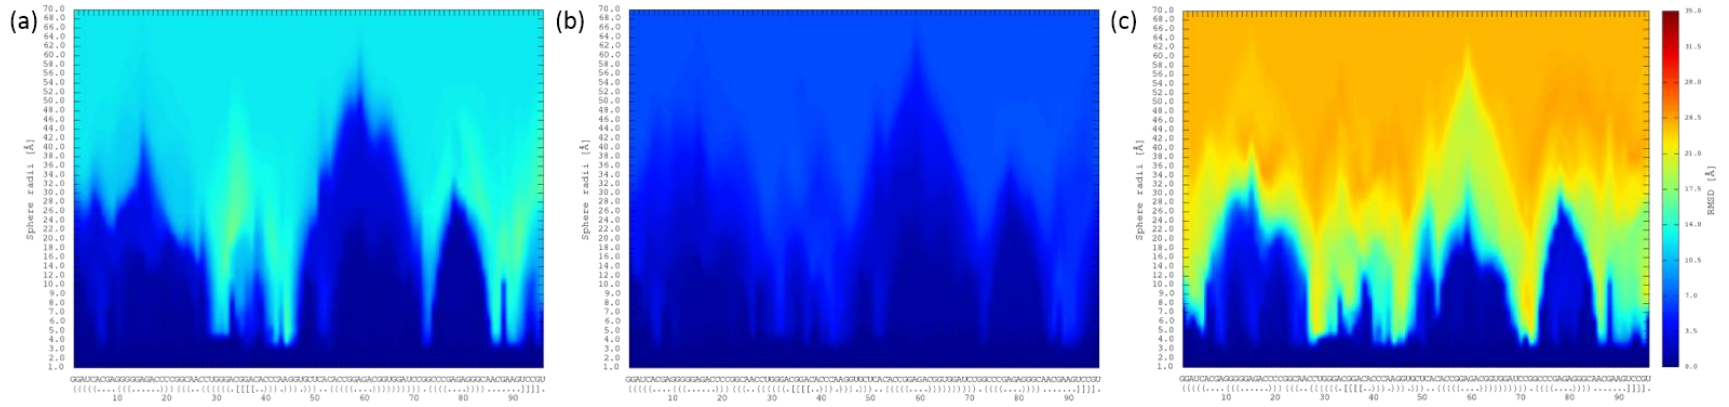

Supplement: 12859_2017_1867_MOESM1_ESM.pdf [file 12859_2017_1867_MOESM1_ESM.pdf]
